# Supplementary material for: Oxidative Stress Marker Aberrations in Multiple Sclerosis: A Meta-Analysis Study
Source: PubMed Central journal article supplement (PMC7479227; doi:10.3389/fnins.2020.00823), 2020-08-26
Supplement: Image_1.pdf [file Image_1.pdf]

Multiple Sclerosis

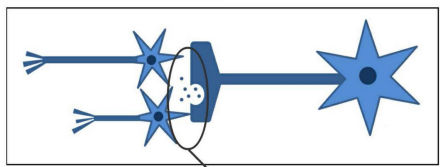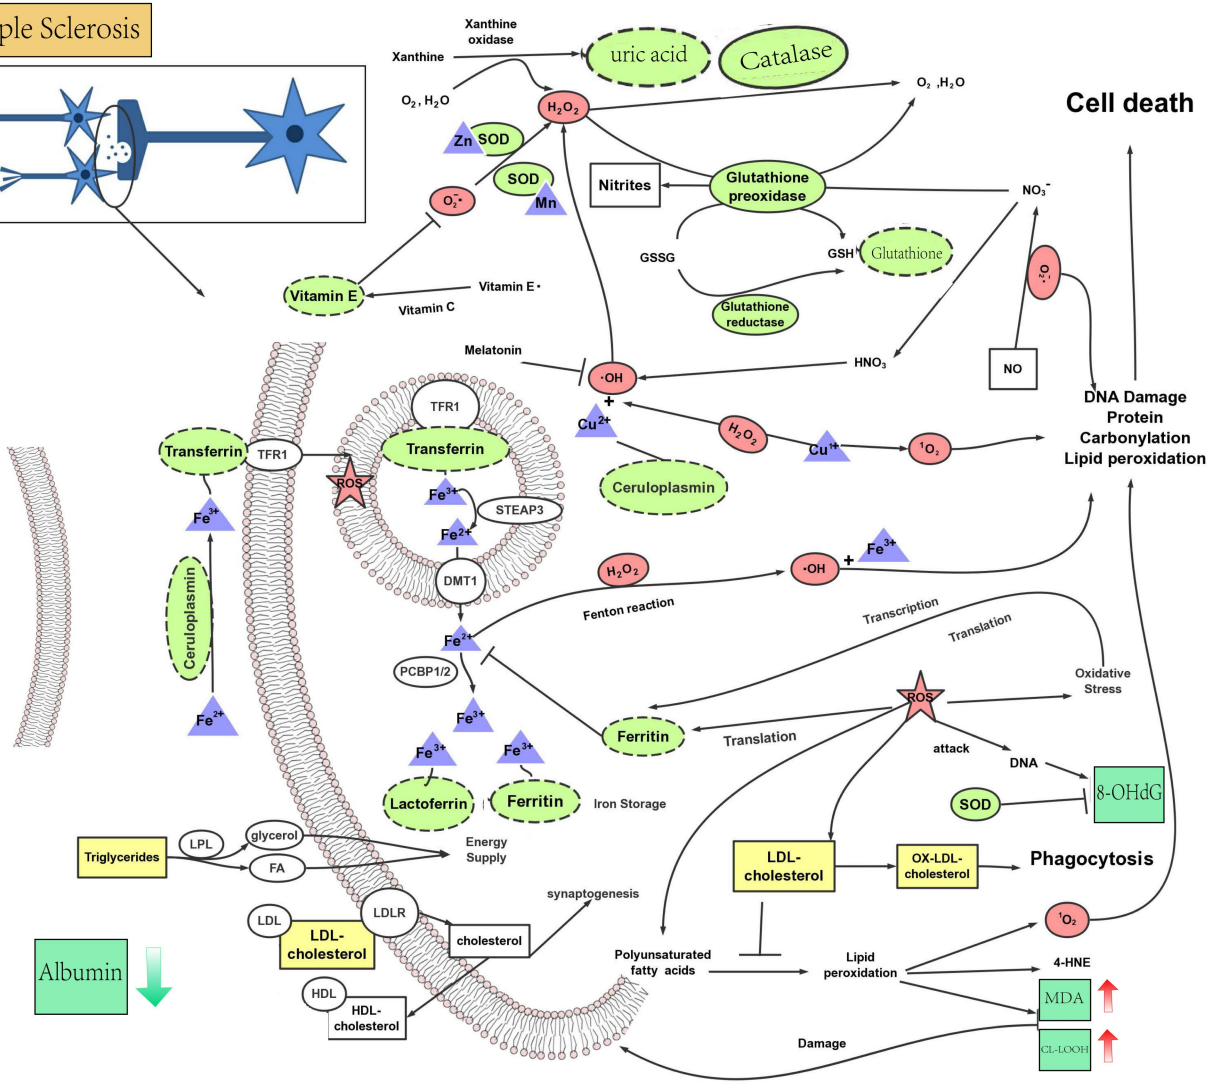

Supplementary Figure 1. Potential relationships between free radicals and antioxidant defenses.
