# Supplementary material for: Oxidative Stress Marker Aberrations in Multiple Sclerosis: A Meta-Analysis Study
Source: PubMed Central journal article supplement (PMC7479227; doi:10.3389/fnins.2020.00823), 2020-08-26
Supplement: Table_1.pdf [file Table_1.pdf]

**Supplementary Table 1: Characteristics of included studies measuring peripheral blood and CSF biomarker concentrations**

| Author, year               | OS factors Measured | Country                | Samples (MS/HC) | Gender | Age   | Sample Source | Duration   | BMI(M S/HC) | EDSS      | Subtype |
|----------------------------|---------------------|------------------------|-----------------|--------|-------|---------------|------------|-------------|-----------|---------|
| Jime nez et al. 1998       | Albumin             | Spain                  | 36/32           | 0.338  | 31.8  | serum         | NA         | NA          | NA        | NA      |
| Keles et al. 2001          | MDA                 | Turkey                 | 30/20           | 0.4    | 35.4  | CSF           | NA         | NA          | NA        | NA      |
| Keles et al. 2001          | MDA                 | Turkey                 | 30/20           | 0.4    | 35.4  | serum         | NA         | NA          | NA        | NA      |
| Ghabaee et al. 2010        | MDA, catalase       | Iran                   | 13/15           | NA     | NA    | CSF           | NA         | NA          | NA        | NA      |
| Ghabaee et al. 2010        | MDA, catalase       | Iran                   | 13/15           | NA     | NA    | serum         | NA         | NA          | NA        | NA      |
| Fjeldstad et al. 2011      | CRP                 | USA                    | 44082           | 0      | NA    | serum         | NA         | NA          | NA        | NA      |
| Hadžović-Džuvo et al. 2011 | TAS                 | Bosnia and Herzegovina | 33/24           | NA     | 3.24  | plasma        | NA         | NA          | NA        | NA      |
| Miller et al. 2011         | TAS, isoprostane    | Poland                 | 44130           | 0.39   | 47.53 | plasma        | 10.0 ± 6.5 | NA          | 6.5 ± 2.0 | SPMS    |

| Author, year               | OS factors Measured                | Country | Samples (MS/HC) | Gender | Age   | Sample Source | Duration   | BMI(M S/HC)           | EDSS        | Subtype |
|----------------------------|------------------------------------|---------|-----------------|--------|-------|---------------|------------|-----------------------|-------------|---------|
| Tavazzi et al. 2011        | MDA                                | Italy   | 170/163         | 0.32   | 31.77 | serum         | 13.5±5.22  | NA                    | 3.26 ± 2.29 | NA      |
| Oliveira et al. 2012       | UA                                 | Brazil  | 91/196          | 0.38   | 37.61 | plasma        | NA         | 24.38/24.09           | NA          | RRMS    |
| Tasset et al. 2012         | GSH, CRP, albumin, cholesterol, UA | Spain   | 24/15           | 0.31   | 40.77 | plasma        | 8.4±8.8    | NA                    | NA          | NA      |
| Acar.M et al. 2012         | SOD, MDA, TOS                      | Turkey  | 35/32           | 0.31   | 35.8  | serum         | 6.22       | NA                    | NA          | NA      |
| Kirbas et al. 2013         | Cholesterol, TOS, TAS              | Turkey  | 30/30           | 0.33   | 29.05 | serum         | NA         | 24.9 ± 4.1 /25.8 ±4.7 | NA          | RRMS    |
| Ashtari et al. 2013        | UA                                 | Iran    | 130/50          | 0.19   | 31.92 | serum         | 5.4±1.8    | NA                    | NA          | NA      |
| Ljubisavljevic et al. 2013 | AOPP ,MDA, catalase, isoprostane   | Serbia  | 57/20           | 0.29   | 38.7  | CSF           | 7          | NA                    | NA          | NA      |
| Ljubisavljevic et al.2013  | AOPP, MDA, catalase, isoprostane   | Serbia  | 57/20           | 0.29   | 38.7  | serum         | 7          | NA                    | NA          | NA      |
| Polachini et al. 2014      | UA                                 | Brazil  | 29/29           | 0.33   | 37.95 | serum         | 9.65 ± 1.7 | NA                    | NA          | NA      |

| Author, year        | OS factors Measured                   | Country  | Samples (MS/HC) | Gender | Age   | Sample Source | Duration | BMI(M S/HC)               | EDSS      | Subtype |
|---------------------|---------------------------------------|----------|-----------------|--------|-------|---------------|----------|---------------------------|-----------|---------|
| Socha et al. 2014   | GSH,TAS                               | Poland   | 101/63          | 0.35   | 40.96 | serum         | NA       | NA                        | NA        | NA      |
| Wang et al. 2014    | CRP, albumin, cholesterol, UA         | China    | 30/20           | 0.3    | 40.4  | serum         | 43840    | NA                        | 16        | NA      |
| Gironi et al. 2014  | GSH,MDA                               | Italy    | 87/77           | 0.43   | 45.27 | serum         | NA       | NA                        | NA        | NA      |
| Yousefi et al. 2014 | MDA                                   | Iran     | 38/38           | 0      | 31    | serum         | NA       | NA                        | NA        | NA      |
| Aydin et al. 2014   | TOS, Albumin, TAS                     | Turkey   | 35/35           | 0.286  | 38    | serum         | NA       | NA                        | NA        | NA      |
| Aydin et al. 2015   | UA, TOS, TAS                          | Turkey   | 35/35           | 0.4    | 38    | plasma        | 6.8 ±5.4 | 26 ±<br>5.3/25 ±<br>4.2   | 1.8 (1–5) | NA      |
| Moccia et al. 2015  | UA                                    | Italy    | 362/181         | 0.41   | 42.3  | plasma        | 14.5±9.5 | NA                        | 3.9±1.4   | NA      |
| Kallaur et al. 2016 | CL-LOOH, CRP, ferritin, albumin, TRAP | Brazil   | 108/249         | 0.29   | 37.8  | serum         | NA       | 25.2±5.1<br>/25.1±4.<br>4 | NA        | NA      |
| Bartova et al. 2016 | MDA                                   | Slovakia | 57              | 0.46   | 49    | CSF           | NA       | NA                        | NA        | NA      |

| Author, year             | OS factors Measured                             | Country  | Samples (MS/HC) | Gender | Age   | Sample Source | Duration  | BMI(M S/HC)           | EDSS      | Subtype |
|--------------------------|-------------------------------------------------|----------|-----------------|--------|-------|---------------|-----------|-----------------------|-----------|---------|
| Oliveira et al. 2017     | CL-LOOH,AOPP, NO                                | Brazil   | 137/218         | 0.32   | 39.97 | serum         | 8.04±7.20 | 25.46±4.54/24.68±5.46 | 3.28±2.35 | NA      |
| Socha et al. 2017        | Cooper                                          | Poland   | 101/68          | 0.34   | 40.58 | serum         | NA        | NA                    | 3.34 ±1.5 | NA      |
| Oliveira et al. 2017     | CL-LOOH, AOPP, CRP, ferritin, albumin, TRAP, NO | Brazil   | 258/249         | 0.29   | 39.95 | serum         | NA        | 25.09±5.1/25.09±4.4   | NA        | MS      |
| Bystrick áet al. 2017    | GSH                                             | Slovakia | 37/37           | 0.22   | 39    | serum         | NA        | NA                    | 2 ±1      | RRMS    |
| Bystrick áet al. 2017    | GSH                                             | Slovakia | 8/37            | 0.22   | 41.71 | serum         | NA        | NA                    | 4 ±1      | SPMS    |
| Roche et al. 2017        | SOD,MDA,AOPP,GSH                                | Jordan   | 28/40           | 0.25   | 36.4  | serum         | NA        | NA                    | NA        | NA      |
| De Riccardis et al. 2018 | Cooper, SOD                                     | Italy    | 38/39           | 0.39   | 37.33 | serum         | NA        | NA                    | NA        | NA      |
| De Riccardis et al. 2018 | Cooper, SOD                                     | Italy    | 19/18           | 0.43   | 35.22 | CSF           | NA        | NA                    | NA        | NA      |
| Juybari et al. 2018      | MDA                                             | Iran     | 50/50           | 0.28   | 47.45 | serum         | 5 ±2.5    | 26.1±4.9              | 3.8       | RRMS    |

| Author, year           | OS factors Measured | Country | Samples (MS/HC) | Gender | Age    | Sample Source | Duration | BMI(M S/HC) | EDSS | Subtype |
|------------------------|---------------------|---------|-----------------|--------|--------|---------------|----------|-------------|------|---------|
| Armon-Omer et al. 2019 | Albumin             | Israel  | 63/83           | 0.377  | 42.369 | serum         | NA       | 25          | NA   | NA      |

**Abbreviations:** OS, Oxidative stress; MDA, malondialdehyde; CL-LOOH, lipid hydroperoxide by tert-butyl hydroperoxide-initiated chemiluminescence; AOPP, advanced oxidation protein product; TOS, total oxidative status; SOD, superoxide dismutase; TAS, total antioxidant status; CRP, total oxidative status; GSH, glutathione; TRAP, total radical-trapping antioxidant parameter; NO, nitric oxide; UA, uric acid; BMI, body mass index; EDSS, expanded disability status scale; NA, not available; MS, multiple sclerosis; RRMS, relapsing remitting multiple sclerosis; SPMS, secondary-progressive multiple sclerosis; HC, healthy control.
